# Supplementary material for: Three new coordination polymers based on bis(4-(4H-1,2,4-triazol-4-yl)phenyl)methane: syntheses, structures, multiresponsive luminescent sensitive detection for antibiotics and pesticides, and antitumor activities
Source: Royal Society of Chemistry journal article supplement (doi:10.1039/c9ra08659e), 2019-01-01
Supplement: c9ra08659e1.pdf [file c9ra08659e1.pdf]

## Supporting Information

### Three new coordination polymers based on bis(4-(4H-1,2,4-triazol-4-yl)phenyl)methane: syntheses, structures, multiresponsive luminescent sensitive detection for antibiotics and pesticides, and antitumor activities

Chang-Sheng Wang<sup>a</sup>, Qi Huang<sup>a</sup>, Xia Wang<sup>a</sup>, Yu-Tong Zhang<sup>a</sup>, Dong-Sheng Ma<sup>a</sup>, Ying-Hui Yu<sup>\*a</sup>, and Jin-Sheng Gao<sup>\*ab</sup>

<sup>a</sup>School of Chemistry and Materials Science, Heilongjiang University, Harbin 150080, China

<sup>b</sup>Agricultural college, Heilongjiang University, Harbin 150080

\*Corresponding author. E-mail: yuyinghui@hlju.edu.cn (Y. H. Yu); gaojins@hlju.edu.cn (J. S. Gao).

Tel: +86-451-86609001. Fax: +86-451-86609151

#### Synthesis of bis(4-(4H-1,2,4-triazol-4-yl)phenyl)methane (L)

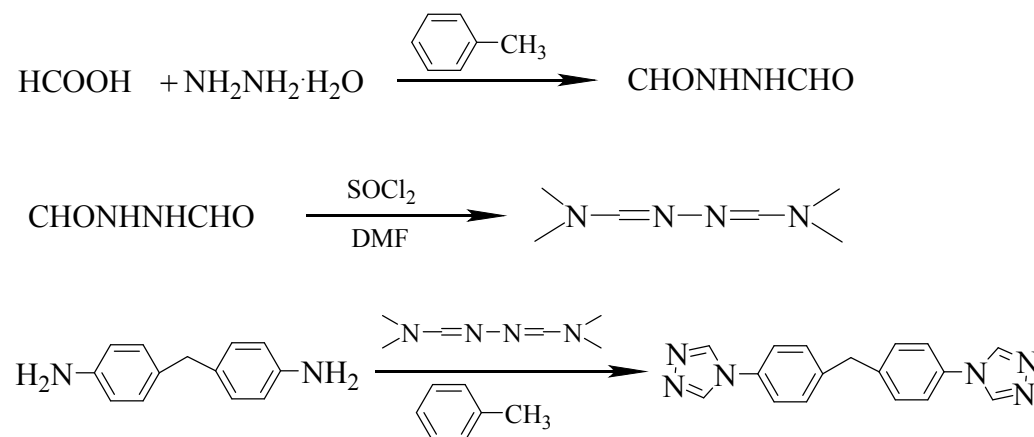

**Scheme S1.** The synthetic route for the ligand.

4,4'-diaminodiphenyl-methane (10 g, 50.38 mmol, 1 equiv) and N'-((dimethylamino)methylene)-N,N-dimethylformohydrazonamide (23.87 g, 111.35mmol, 2 equiv) in toluene (250 mL) was stirred vigorously and refluxed for 8 h. The pale yellow solid obtained was filtered, and washed with cold EtOH (1 × 3 mL). The solid was dissolved in hot EtOH (30 mL), treated with a pinch of charcoal and filtered. White crystals obtained was separated and dried under vacuum; yield: 21.4g (75%); mp 262 °C. <sup>1</sup>H NMR (400 MHz, DMSO-d<sub>6</sub>) δ 9.08 (s, 4H), 7.61 (d, J = 8.5 Hz, 4H), 7.50 (d, J = 8.6 Hz, 4H), 3.83

(s, 2H).<sup>13</sup>C NMR (101 MHz, DMSO-d<sub>6</sub>) δ 141.88, 130.60, 130.48, 129.43, 121.87, 34.51. Chemical Formula: C<sub>17</sub>H<sub>14</sub>N<sub>6</sub>. Exact Mass: 302.13. Elemental Analysis: C, 67.54; H, 4.67; N, 27.80.

**Table S1.** Selected bond distances (Å) and angles (°) for **CP 1**

| <b>CP 1</b>     |           |                 |           |
|-----------------|-----------|-----------------|-----------|
| Mo(4)-O(7)      | 1.687(8)  | Mo(4)-O(3)      | 1.755(8)  |
| Mo(4)-O(5)      | 1.944(8)  | Mo(4)-O(2)      | 1.961(7)  |
| Mo(4)-O(1)      | 2.138(7)  | Mo(4)-O(1)#1    | 2.377(7)  |
| Mo(1)-O(8)      | 1.703(8)  | Mo(1)-O(9)      | 1.715(8)  |
| Mo(1)-O(6)      | 1.887(8)  | Mo(1)-O(2)      | 2.009(8)  |
| Mo(1)-O(1)      | 2.296(8)  | Mo(1)-O(5)#1    | 2.398(8)  |
| Mo(3)-O(10)     | 1.690(9)  | Mo(3)-O(11)     | 1.711(8)  |
| Mo(3)-O(4)      | 1.892(8)  | Mo(3)-O(5)      | 2.000(8)  |
| Mo(3)-O(1)      | 2.302(7)  | Mo(3)-O(2)#1    | 2.355(8)  |
| Mo(2)-O(13)     | 1.695(9)  | Mo(2)-O(12)     | 1.699(9)  |
| Mo(2)-O(6)      | 1.931(8)  | Mo(2)-O(4)      | 1.946(8)  |
| Mo(2)-O(3)#1    | 2.276(8)  | Mo(2)-O(1)      | 2.518(8)  |
| Ag(2)-N(5)      | 2.193(12) | Ag(2)-N(9)      | 2.205(11) |
| Ag(2)-N(8)#2    | 2.395(11) | Ag(1)-N(7)      | 2.242(11) |
| Ag(1)-N(6)#3    | 2.248(11) | Ag(1)-N(10)#2   | 2.331(12) |
| O(7)-Mo(4)-O(3) | 104.9(4)  | O(7)-Mo(4)-O(5) | 102.3(4)  |
| O(3)-Mo(4)-O(5) | 96.3(3)   | O(7)-Mo(4)-O(2) | 100.4(4)  |

|                    |          |                    |          |
|--------------------|----------|--------------------|----------|
| O(3)-Mo(4)-O(2)    | 96.8(3)  | O(5)-Mo(4)-O(2)    | 149.8(3) |
| O(7)-Mo(4)-O(1)    | 98.7(3)  | O(3)-Mo(4)-O(1)    | 156.4(3) |
| O(5)-Mo(4)-O(1)    | 78.3(3)  | O(2)-Mo(4)-O(1)    | 78.8(3)  |
| O(7)-Mo(4)-O(1)#1  | 173.7(3) | O(3)-Mo(4)-O(1)#1  | 81.2(3)  |
| O(5)-Mo(4)-O(1)#1  | 78.4(3)  | O(2)-Mo(4)-O(1)#1  | 76.9(3)  |
| O(1)-Mo(4)-O(1)#1  | 75.3(3)  | O(8)-Mo(1)-O(9)    | 103.6(4) |
| O(8)-Mo(1)-O(6)    | 102.0(4) | O(9)-Mo(1)-O(6)    | 100.9(4) |
| O(8)-Mo(1)-O(2)    | 99.3(4)  | O(9)-Mo(1)-O(2)    | 97.7(4)  |
| O(6)-Mo(1)-O(2)    | 147.4(3) | O(8)-Mo(1)-O(1)    | 96.2(3)  |
| O(9)-Mo(1)-O(1)    | 159.6(4) | O(6)-Mo(1)-O(1)    | 79.2(3)  |
| O(2)-Mo(1)-O(1)    | 74.2(3)  | O(8)-Mo(1)-O(5)#1  | 165.8(3) |
| O(9)-Mo(1)-O(5)#1  | 87.9(4)  | O(6)-Mo(1)-O(5)#1  | 83.6(3)  |
| O(2)-Mo(1)-O(5)#1  | 70.5(3)  | O(1)-Mo(1)-O(5)#1  | 71.8(3)  |
| O(10)-Mo(3)-O(11)  | 104.2(4) | O(10)-Mo(3)-O(4)   | 101.5(4) |
| O(11)-Mo(3)-O(4)   | 100.6(4) | O(10)-Mo(3)-O(5)   | 98.2(4)  |
| O(11)-Mo(3)-O(5)   | 99.6(4)  | O(4)-Mo(3)-O(5)    | 147.2(3) |
| O(10)-Mo(3)-O(1)   | 95.0(4)  | O(11)-Mo(3)-O(1)   | 160.3(4) |
| O(4)-Mo(3)-O(1)    | 79.0(3)  | O(5)-Mo(3)-O(1)    | 73.4(3)  |
| O(10)-Mo(3)-O(2)#1 | 164.7(3) | O(11)-Mo(3)-O(2)#1 | 89.0(4)  |
| O(4)-Mo(3)-O(2)#1  | 83.3(3)  | O(5)-Mo(3)-O(2)#1  | 71.6(3)  |
| O(1)-Mo(3)-O(2)#1  | 71.4(3)  | O(13)-Mo(2)-O(12)  | 105.3(5) |

|                    |          |                      |          |
|--------------------|----------|----------------------|----------|
| O(13)-Mo(2)-O(6)   | 103.4(4) | O(12)-Mo(2)-O(6)     | 98.3(4)  |
| O(13)-Mo(2)-O(4)   | 104.2(4) | O(12)-Mo(2)-O(4)     | 97.0(4)  |
| O(6)-Mo(2)-O(4)    | 143.5(3) | O(13)-Mo(2)-O(3)#1   | 89.5(4)  |
| O(12)-Mo(2)-O(3)#1 | 165.3(4) | O(6)-Mo(2)-O(3)#1    | 78.1(3)  |
| O(4)-Mo(2)-O(3)#1  | 78.7(3)  | O(13)-Mo(2)-O(1)     | 158.6(4) |
| O(12)-Mo(2)-O(1)   | 96.1(4)  | O(6)-Mo(2)-O(1)      | 72.9(3)  |
| O(4)-Mo(2)-O(1)    | 72.7(3)  | O(3)#1-Mo(2)-O(1)    | 69.2(3)  |
| N(5)-Ag(2)-N(9)    | 149.7(4) | N(5)-Ag(2)-N(8)#2    | 106.2(4) |
| N(9)-Ag(2)-N(8)#2  | 104.1(4) | N(7)-Ag(1)-N(6)#3    | 152.6(4) |
| N(7)-Ag(1)-N(10)#2 | 105.2(4) | N(6)#3-Ag(1)-N(10)#2 | 102.2(4) |

---

Symmetry Code:#1  $-x+3/2,-y+3/2,-z+2$ ,#2  $x+1/2,-y+1/2,z+1/2$ ,#3  $x+1/2,-y+3/2,z+1/2$ ,#4  $x-1/2,-y+3/2,z-1/2$ ,#5  $x-1/2,-y+1/2,z-1/2$ .

---

**Table S2.** Selected bond distances (Å) and angles (°) for **CP 2**

| <b>CP 2</b>       |            |                   |            |
|-------------------|------------|-------------------|------------|
| Zn(1)-O(2)        | 1.9430(13) | Zn(1)-O(4)        | 1.9499(13) |
| Zn(1)-N(4)#1      | 2.0020(15) | Zn(1)-N(1)        | 2.0484(15) |
| O(2)-Zn(1)-O(4)   | 111.17(6)  | O(2)-Zn(1)-N(4)#1 | 115.08(6)  |
| O(4)-Zn(1)-N(4)#1 | 119.59(7)  | O(2)-Zn(1)-N(1)   | 112.22(6)  |
| O(4)-Zn(1)-N(1)   | 96.46(6)   | N(4)#1-Zn(1)-N(1) | 99.82(6)   |

---

Symmetry Code:#1  $-x+2,-y,-z+2$ ,#2  $-x+1,-y+1,-z+1$ ,#3  $-x+2,-y+2,-z+1$ ,#4  $-x+2,-y+2,-z+1$ .

---

---

$z+2, \#5 -x+3, -y, -z+2.$

---

**Table S3.** Selected bond distances (Å) and angles (°) for **CP 3**

---

| <b>CP 3</b>         |            |                     |           |
|---------------------|------------|---------------------|-----------|
| Cd(1)-O(1)          | 2.2424(18) | Cd(1)-N(2)          | 2.322(2)  |
| Cd(1)-O(2)#1        | 2.3282(19) | Cd(1)-N(5)#2        | 2.341(2)  |
| Cd(1)-N(6)#3        | 2.355(2)   | Cd(1)-N(3)#1        | 2.386(2)  |
| O(1)-Cd(1)-N(2)     | 113.76(7)  | O(1)-Cd(1)-O(2)#1   | 156.93(7) |
| N(2)-Cd(1)-O(2)#1   | 88.98(7)   | O(1)-Cd(1)-N(5)#2   | 99.93(8)  |
| N(2)-Cd(1)-N(5)#2   | 89.96(7)   | O(2)#1-Cd(1)-N(5)#2 | 83.13(8)  |
| O(1)-Cd(1)-N(6)#3   | 92.58(9)   | N(2)-Cd(1)-N(6)#3   | 85.65(8)  |
| O(2)#1-Cd(1)-N(6)#3 | 85.06(8)   | N(5)#2-Cd(1)-N(6)#3 | 167.47(8) |
| O(1)-Cd(1)-N(3)#1   | 77.99(7)   | N(2)-Cd(1)-N(3)#1   | 167.70(7) |
| O(2)#1-Cd(1)-N(3)#1 | 79.09(7)   | N(5)#2-Cd(1)-N(3)#1 | 91.53(8)  |
| N(6)#3-Cd(1)-N(3)#1 | 90.33(8)   |                     |           |

---

Symmetry Code: #1-x+2,y-1/2,-z+1/2,#2 x+1,-y+3/2,z+1/2,#3 -x+1,-y+1,-z,#4 -  
x+2,y+1/2,-z+1/2,#5 x-1,-y+3/2,z-1/2,#6 -x+2,-y+2,-z+1.

---

## Detection of antibiotics

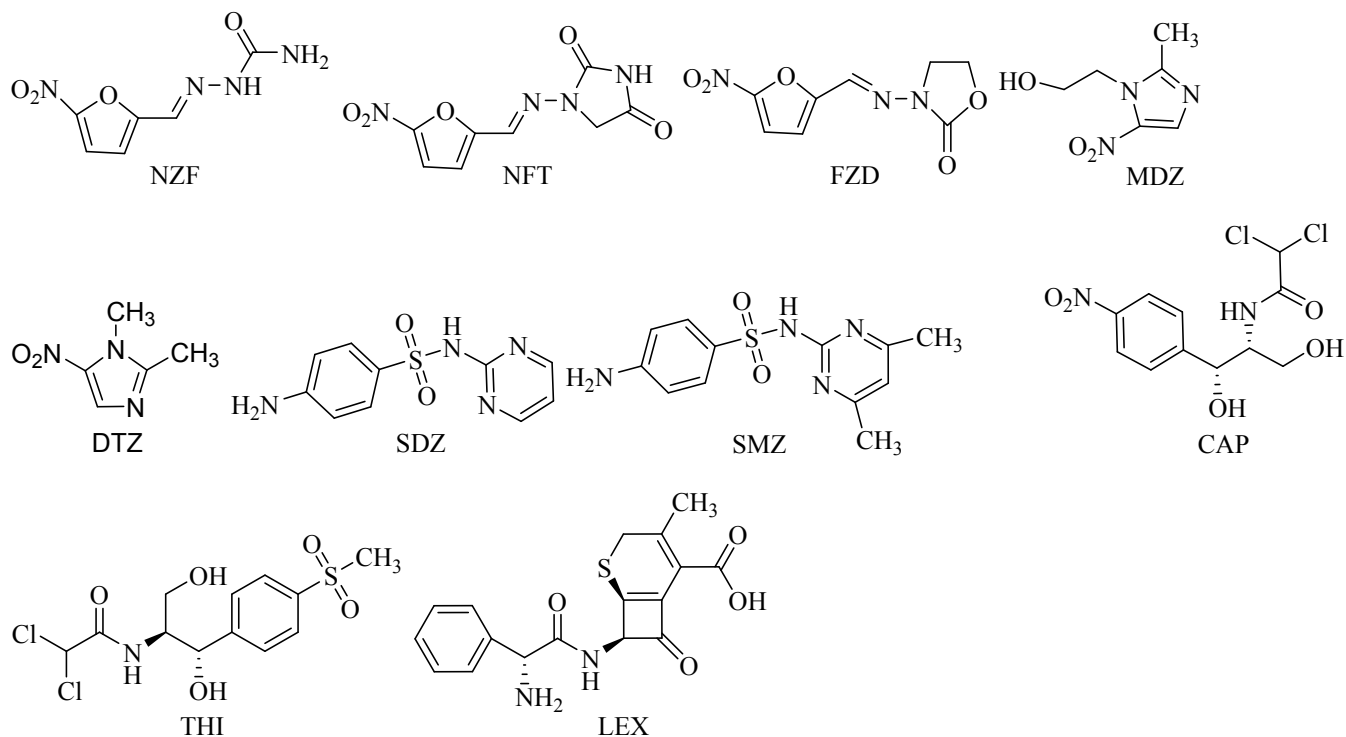

## Detection of pesticide

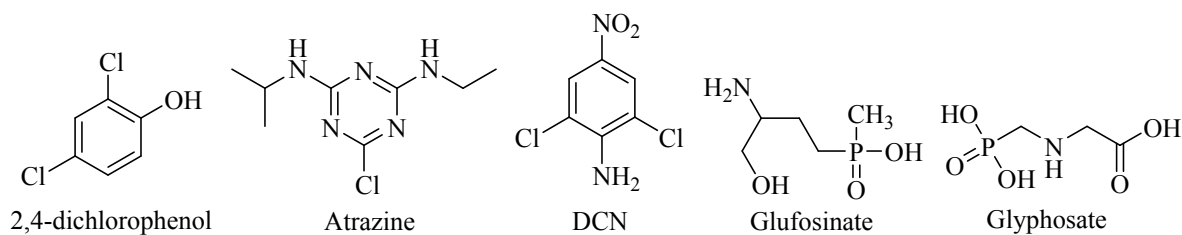

**Table S4.** HOMO and LUMO energies for the selected antibiotics calculated by the calculation formula  $(-|4.78+x|eV)$

| Analytes | HUMO (eV) | LUMO (eV) | Band Gap (eV) |
|----------|-----------|-----------|---------------|
| NZF      | -6.36     | -4.1      | 2.26          |
| NFT      | -6.53     | -4.27     | 2.26          |

|     |       |       |      |
|-----|-------|-------|------|
| MDZ | -6.51 | -3.83 | 2.68 |
| DTZ | -6.5  | -3.7  | 2.8  |
| SDZ | -5.98 | -3.36 | 2.62 |
| SMZ | -6.05 | -3.12 | 2.93 |
| CAP | -6.43 | -3.91 | 2.52 |
| THI | -6.58 | -3.27 | 3.31 |
| LEX | -6.44 | -3.49 | 2.95 |
| FZD | -6.75 | -4.14 | 2.61 |

**Table S5.** HOMO and LUMO energies for the selected pesticides calculated by the calculation formula  $(-|4.78+x|eV)$

| <b>Analytes</b>    | <b>HUMO (eV)</b> | <b>LUMO (eV)</b> | <b>Band Gap (eV)</b> |
|--------------------|------------------|------------------|----------------------|
| 2,4-dichlorophenol | -6.32            | -2.57            | 3.75                 |
| Atrazine           | -6.43            | -2.54            | 3.89                 |
| DCN                | -6.63            | -3.84            | 2.79                 |
| Glufosinate        | -6.45            | -4.18            | 2.27                 |
| Glyphosate         | -6.45            | -2.46            | 3.99                 |

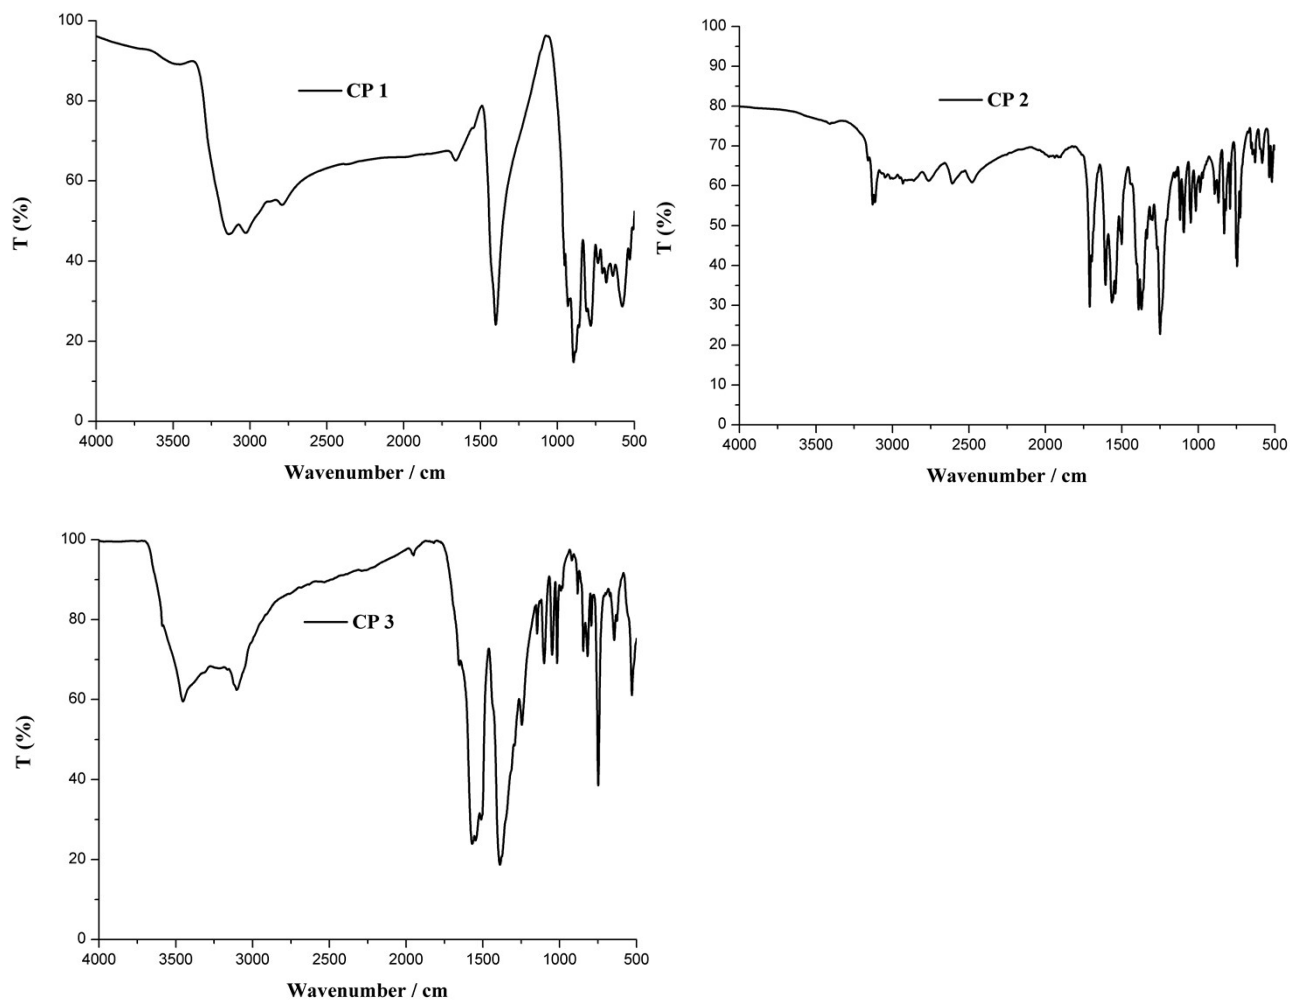

**Fig. S1** The IR spectra of CP 1-3

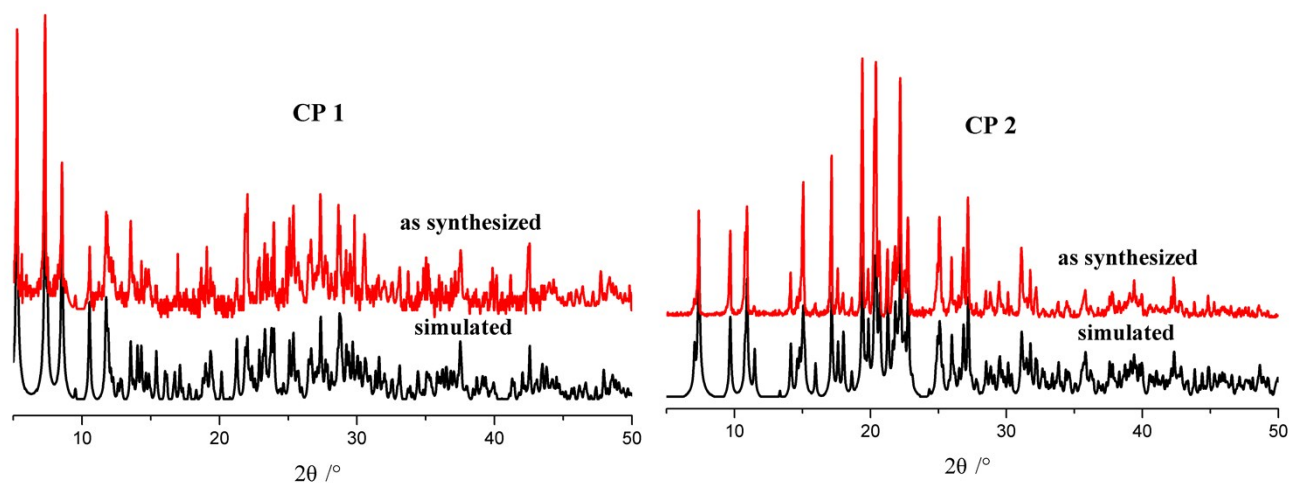



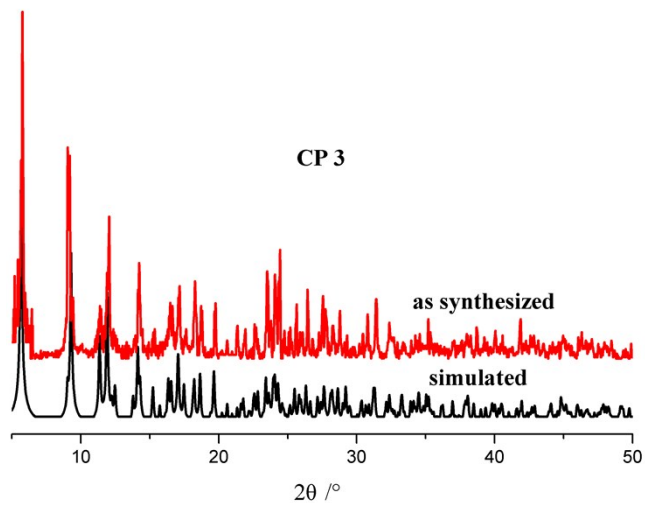

Fig. S2 PXRD patterns of CP 1-3

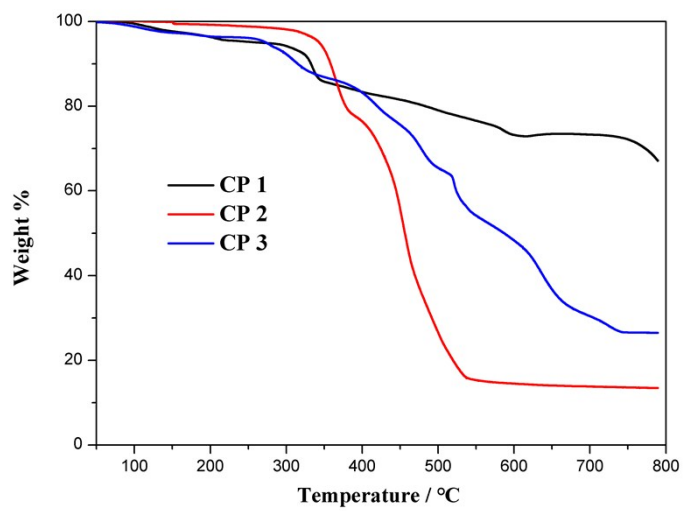

Fig. S3 The TGA diagram of CP 1-3

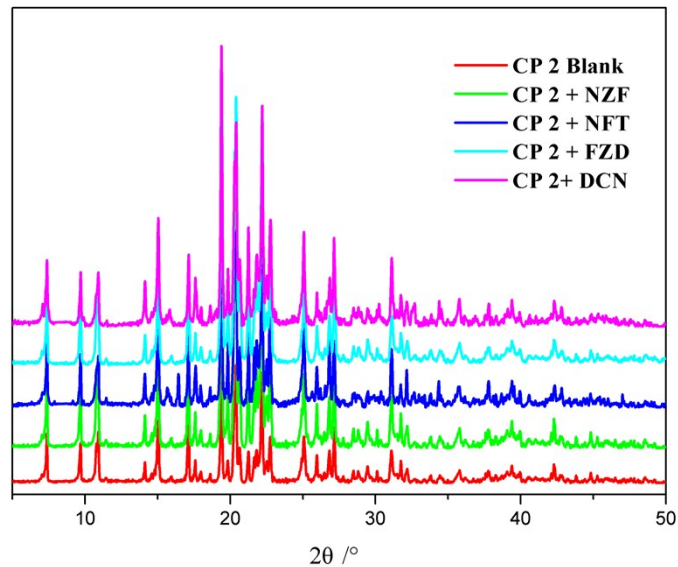

**Fig. S4** PXRD patterns of CP 2 after immersed in the water solution (1.0 mM) with different analytes nitrofurazone (NZF), nitrofurantoin (NFT), furazolidone (FZD) and 2,6-dichloro-4-nitroaniline (DCN) for 12 hours.

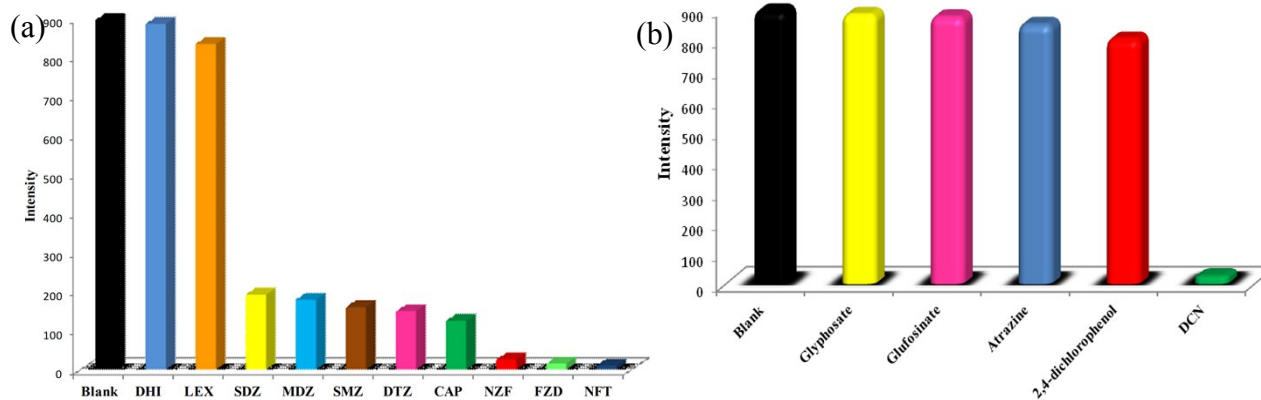

**Fig. S5** (a) Comparison of the fluorescence intensities of CP 2 treated by 0.30 mM different antibiotics. (b) Fluorescence intensities of CP 2 immersed in 0.30 mM DMF solution of different pesticides.

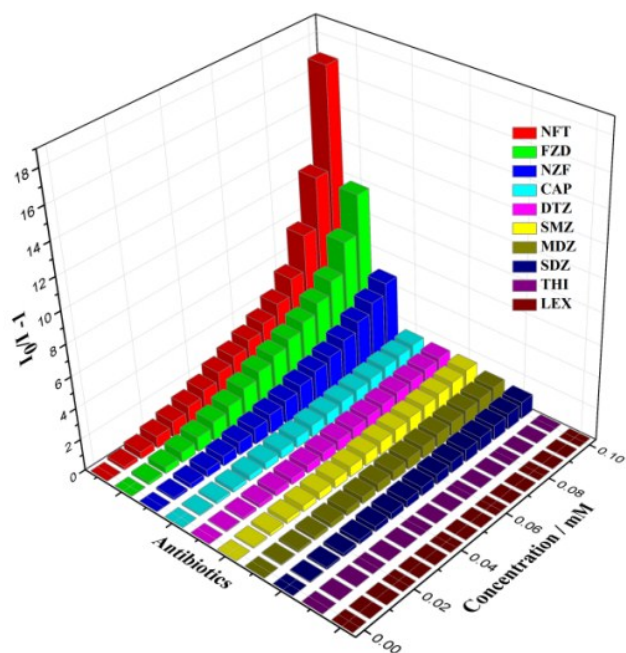

**Fig. S6** Stern–Volmer plots of selected antibiotics of CP 2.

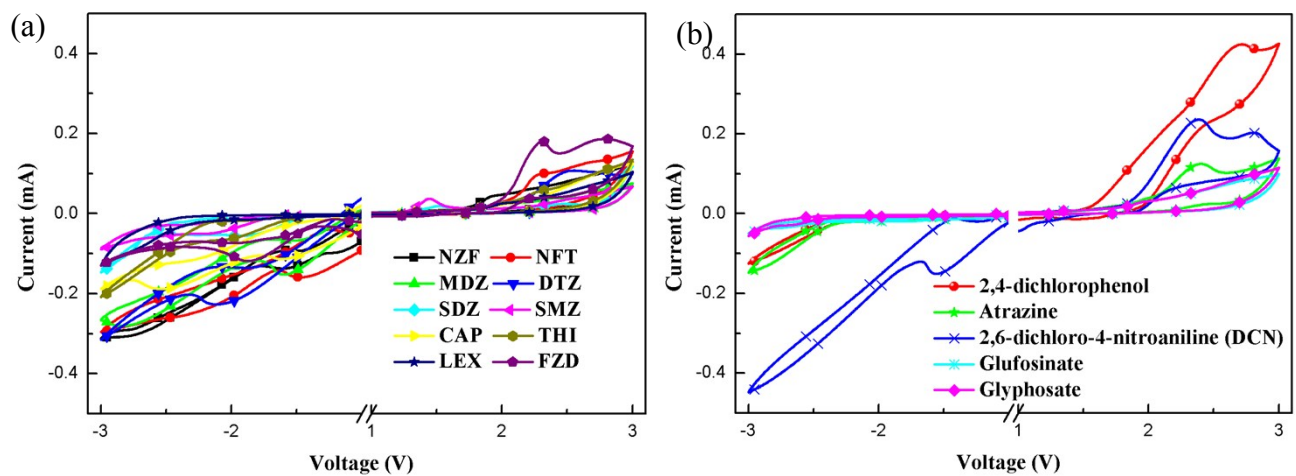

**Fig. S7** Electrochemical map of selected antibiotics (a) and pesticides (b).

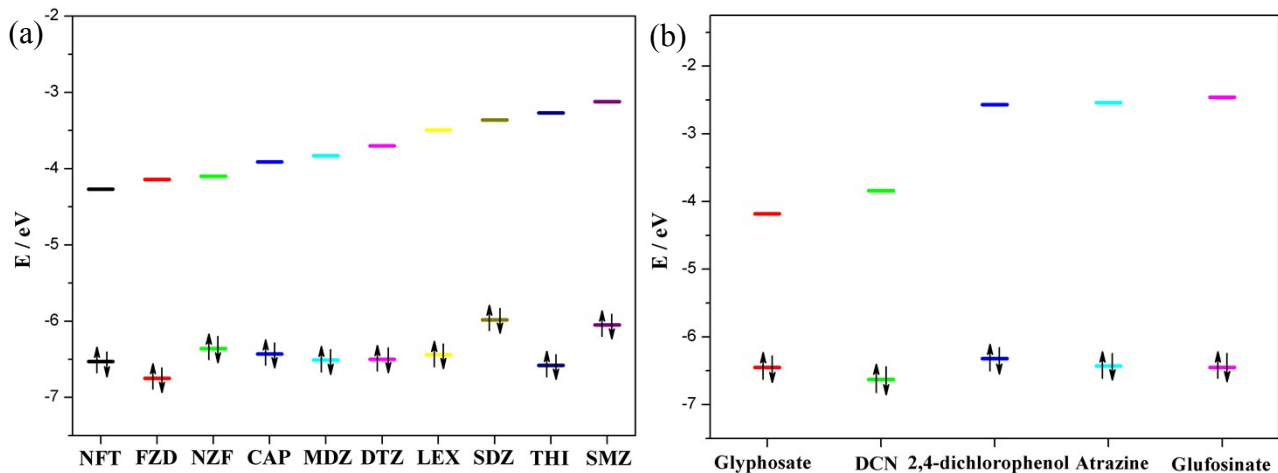

**Fig. S8** HOMO and LUMO energies for the selected antibiotics (a) and pesticides (b) calculated by the calculation formula  $(-|4.78+x|eV)$ .

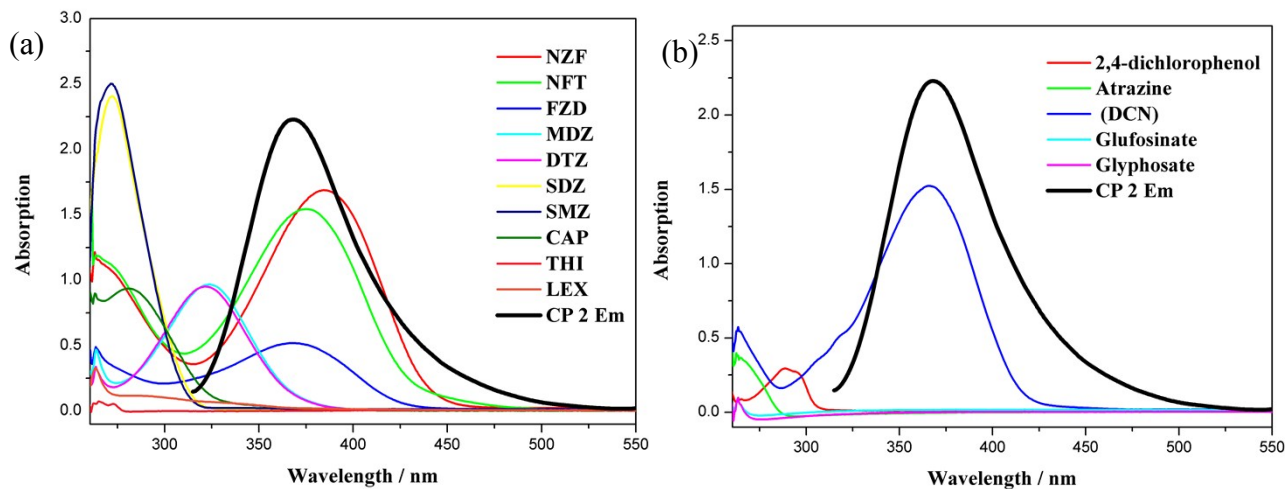

**Fig. S9.** UV-vis absorption spectra of selected antibiotics (a) and pesticides (b) (0.10 mM) and the normalized emission spectra of CP 2 in water.

## References

1. S. S. Han, L. L. Shi, K. Li, S. Zhao, B. L. Li and B. Wu. *RSC Adv.*,2015, **5**, 107166-107178.
2. N. Wang, Y. C. Feng, W. Shi, B. Zhao, P. Cheng, D. Z. Liao and S. P. Yan. *CrystEngComm.*,2012, **14**, 2769-2778.
